# Shorter telomere length is associated with a more recent diagnosis of coeliac disease

Pierre Goorkiz<sup>1</sup>, Nerissa L Hearn<sup>1</sup>, Saskia van der Kooi<sup>1</sup>, Christine L Chiu<sup>2</sup>, Joanne M Lind<sup>1,2</sup>

<sup>1</sup> School of Medicine, Western Sydney University, NSW, Australia.

<sup>2</sup> Faculty of Medicine and Health Sciences, Macquarie University, NSW, Australia

Corresponding author

Christine Chiu

email: [christine.chiu@mq.edu.au](mailto:christine.chiu@mq.edu.au)

PG: laboratory work, data analysis, manuscript writing. NLH and SVDK: data collection and analysis. CLC and JML: data collection and analysis, manuscript writing. All authors have approved the final manuscript.

## 1 **Abstract**

2 Background: Coeliac disease (CD) is an autoimmune disease that causes an inappropriate  
3 inflammatory immune response to dietary gluten. Telomere length is a marker of biological  
4 ageing and is reduced in several autoimmune conditions. This observational study measured  
5 salivary telomere length (TL) in gluten-free diet (GFD) treated CD individuals to determine if  
6 CD, and length of time on a GFD, is associated with salivary TL.

7 Methods: Clinical and demographic information was collected from CD individuals currently  
8 treated with a GFD and healthy non-affected controls. Only participants aged under 35 years  
9 at recruitment were included. Relative telomere length was measured using quantitative PCR  
10 in oral mucosa collected from saliva. Linear regression was used to determine whether  
11 salivary TL was associated with CD, or length of time on a GFD, adjusting for age and sex.

12 Results: This study included 79 participants, 52 GFD-treated CD and 27 non-affected controls.  
13 No significant difference in salivary TL between individuals with treated CD and controls was  
14 found. Within CD individuals, salivary TL was associated with length of time on a GFD, with  
15 individuals who started a GFD  $\leq 3$  years ago having shorter salivary TL compared to those  
16 who started a GFD  $> 3$  years ago ( $0.37 \pm 0.05$  vs  $0.50 \pm 0.04$ ;  $p=0.002$ ).

17 Conclusion: Our findings indicate that salivary TL shorten while CD is untreated, however  
18 following treatment on a GFD, they appear to recover to those seen in unaffected controls.  
19 This highlights the importance of early diagnosis and initiation of GFD to minimise mucosal  
20 damage and telomere shortening, to enable TL to recover.

21

## 22 Introduction

23 Coeliac disease (CD) is an autoimmune disorder characterised by damage to the small  
24 intestine in genetically predisposed individuals [1]. In individuals with CD, exposure to dietary  
25 gluten triggers an immune response producing oxidative stress, inflammation and histological  
26 changes within the intestinal mucosa [2-4]. The only treatment is a lifelong gluten free diet  
27 (GFD) which, results in remission of immune mediated intestinal damage and symptom  
28 resolution [4].

29 Telomeres are repetitive DNA sequences that cap the end of chromosomes, protecting them  
30 from degradation and chromosome fusion[5]. These structures progressively shorten with  
31 each cell division, until they reach a critical length and induce cell senescence and/or cell  
32 death. Telomere length (TL) is therefore widely considered as a marker of biological ageing.  
33 Shorter telomeres are associated with states of inflammation and oxidative stress, where  
34 progressive cell damage results in greater cell turnover, and free radical mediated damage  
35 results in 'clipping' of telomere DNA during each cycle of division [6-8]. The effects of  
36 inflammation and oxidative stress on TL have been shown to be reversible, with length  
37 gradually recovering when these stressors are removed [9].

38 Shorter TL have been associated with autoimmune conditions, asthma, and depression [10-  
39 12]. In CD, shorter TL have been reported in small intestinal biopsy samples and peripheral  
40 blood lymphocytes of individuals with CD compared to healthy controls [13]. However, these  
41 studies measured TL in individuals with active or untreated CD, that is, in individuals  
42 consuming a gluten-containing diet. No studies have investigated whether TL can recover  
43 after treatment of CD with a GFD. The aim of this study was to determine whether salivary TL  
44 differed between CD individuals currently on a GFD and age-matched healthy controls in a  
45 population of individuals under 35 years of age. This study also aimed to determine whether  
46 the length of time on a GFD was associated with TL recovery in individuals with CD.

## 47 **Methods**

### 48 **Participant recruitment and inclusion criteria**

49 Recruitment was carried out between April 2014 and December 2016. Individuals were  
50 recruited from the gastroenterology clinic at Campbelltown Hospital, NSW, and from the  
51 general population at the 2014, 2015 and 2016 Gluten-Free Expos in Sydney and Melbourne,  
52 Australia. Following written informed consent, individuals were asked questions regarding  
53 their health and disease status, as previously described [14]. Saliva samples were collected  
54 from all participants using the Oragene DNA OG500 self-collection kits (DNA Genotek,  
55 Canada). This study was approved by the Western Sydney University Research Ethics  
56 Committee (approval number H10513) and was carried out in accordance with the ethical  
57 standards laid down in the 1964 Declaration of Helsinki and its later amendments.

58 Only individuals between the age of 18 and 35 at the time of recruitment were included in the  
59 study. Individuals were defined as having CD if they fulfilled the following criteria: had been  
60 diagnosed with CD via duodenal biopsy by a gastrointestinal specialist; were currently on a  
61 GFD; and carried at least one HLA-DQ2 or HLA-DQ8 haplotype. Endoscopy reports were  
62 obtained for a subset of CD participants to verify CD histology and confirm their CD status.  
63 Individuals were classified as non-affected controls if they reported not having CD or CD  
64 associated symptoms and were not on a GFD.

65 BMI was analysed as a categorical variable according to World Health Organization guidelines  
66 [15]. Individuals were classified as current, past, or non-smokers, and alcohol consumption  
67 was categorised into zero, 1-2, and 3-7 standard drinks per week. The length of time on a  
68 GFD was calculated by subtracting the date of commencement of a GFD from the recruitment  
69 date. CD individuals were dichotomised  $\leq 3$  years since starting a GFD and  $>3$  years since  
70 starting a GFD. Participants reported if they had ever been diagnosed with cancer, depression,  
71 asthma, or any of the following autoimmune conditions: Type 1 diabetes mellitus; Autoimmune

72 thyroid disease; Rheumatoid arthritis; Lupus; Dermatitis herpetiformis; or Psoriasis. Data from  
73 depression, asthma and autoimmune condition variables were combined to generate the  
74 variable 'associated conditions' as the prevalence of each individual condition was low.  
75 Individuals with missing data; a history of cancer; or who were current or past smokers, were  
76 excluded.

## 77 **DNA extraction and HLA genotyping**

78 Collected saliva was stored at room temperature until DNA extraction, as per the  
79 manufacturer's recommendations. Genomic DNA was extracted as per the Oragene prep IT  
80 L2P (DNA Genotek, Canada) protocol, purified using the Qiagen DNA mini kit (Qiagen,  
81 Germany) spin column protocol, and the samples were stored at -20°C until analysis. All  
82 samples were genotyped for the CD susceptibility haplotypes HLA-DQ2 and HLA-DQ8 using  
83 TaqMan SNP genotyping assays as previously described[16].

## 84 **Measurement of relative telomere lengths**

85 Relative telomere length in saliva was measured using quantitative PCR as previously  
86 described[17, 18]. This method expresses telomere length as a ratio (T/S) of telomere repeat  
87 copy number (T) to haemoglobin subunit beta (*HBB*) single copy gene (S) within each sample.  
88 Therefore, a higher T/S corresponds to longer telomeres. All samples were run in triplicate,  
89 and a calibrator was included on each plate, and the coefficient of variability (CV) between  
90 plates was 8.44%. Cycle threshold (Ct) values for each sample were calculated using the  
91 MxPro QPCR software (Stratagene, Agilent Technologies, USA). Triplicate Ct values were  
92 averaged and the quantity of each sample was calculated relative to the calibrator using the  
93 delta-delta Ct method [19].

## 94 **Statistical analysis**

95 Prior to analysis, T/S ratio values were transformed into natural logarithms to obtain a  
96 Gaussian distribution. Multinomial logistic regression was used to determine if there were  
97 significant differences in demographic and lifestyle factors between the GFD  $\leq 3$  yrs CD  
98 individuals and unaffected controls, and the GFD  $> 3$  yrs CD individuals and unaffected  
99 controls. Generalised linear models (GLZM) was used to compare salivary TL between the  
100 CD groups and unaffected controls, and between the GFD  $\leq 3$  yrs CD and GFD  $> 3$  yrs CD,  
101 adjusting for age. P values  $< 0.05$  were considered statistically significant. All analysis was  
102 performed using the IBM SPSS statistics software (version 24).

103

## 104 **Results and discussion**

105 A total of 79 individuals, 52 CD and 27 non-affected controls were included in the study (Fig  
106 1). These individuals were aged between 18 and 35 years, had not been previously diagnosed  
107 with any type of cancer, and reported having never smoked. There were significantly more  
108 female participants compared to males (88.6% vs 11.4%). There were no significant  
109 differences in age, BMI, alcohol consumption or presence of associated conditions between  
110 individuals with CD and non-affected controls (Table 1). Age, sex, BMI, alcohol consumption,  
111 or presence of associated conditions were not associated with salivary TL, however as age is  
112 a known predictor of TL, all subsequent analyses were adjusted for age. Stratifying the CD  
113 cohort by length of time on a GFD found CD individuals who had commenced a GFD  $\leq 3$  years  
114 ago had shorter TL when compared to non-affected controls, but this was not significant  
115 ( $0.37 \pm 0.05$  vs  $0.44 \pm 0.04$ ;  $p = 0.12$ ). While for CD individuals who had commenced a GFD  
116  $> 3$  years ago, no difference in TL was observed when compared to non-affected controls  
117 ( $0.50 \pm 0.04$  vs  $0.44 \pm 0.04$ ;  $p = 0.34$ ). Within the CD cohort, length of time on a GFD was  
118 significantly associated with relative salivary TL, with CD individuals who had commenced a  
119 GFD  $\leq 3$  years ago having shorter TL compared with individuals who had removed gluten from  
120 their diet  $> 3$  years ago ( $0.37 \pm 0.05$  vs  $0.50 \pm 0.04$ ;  $p = 0.002$ ) (Fig 2).

121

122 **Figure 1. Overview of study participants.**

123 **Figure 2. Measurement of salivary telomere length.** Salivary telomere length of non-  
124 affected controls and individuals with CD who had been on a GFD for  $\leq 3$  years and  $>3$  years.

125

126 Table 1. Demographic and lifestyle factors of individuals with coeliac disease compared with controls

| Characteristic           |        | <u>Control</u> | <u>CD ≤3yrs</u> |                            | <u>CD &gt;3yrs</u> |                            |
|--------------------------|--------|----------------|-----------------|----------------------------|--------------------|----------------------------|
|                          |        | n=27(%)        | n=20 (%)        | OR [95% CI]; p-value       | n=32 (%)           | OR [95% CI]; p-value       |
| Age (mean±SE years)      |        | 22.9 ± 0.8     | 24.0 ± 1.0      | 0.07 ± 0.08; p=0.36*       | 25.4 ± 0.7         | 0.15 ± 0.07; p=0.03*       |
| Sex                      | Male   | 5 (18.5)       | 2 (10.0)        | 1.00                       | 2 (6.2)            | 1.00                       |
|                          | Female | 22 (81.5)      | 18 (90.0)       | 0.49[0.09 – 2.82]; p=0.42  | 30 (93.8)          | 0.29[0.05 – 1.65]; p=0.17  |
| BMI (kg/m <sup>2</sup> ) | <25    | 21 (77.8)      | 14 (70.0)       | 1.00                       | 23 (71.9)          | 1.00                       |
|                          | 25-30  | 5 (18.5)       | 4 (20.0)        | 1.20[0.27 – 5.26]; p=0.81  | 5 (15.6)           | 0.91[0.23 – 3.61]; p=0.90  |
|                          | 30+    | 1 (3.7)        | 2 (10.0)        | 3.00[0.25 – 36.33]; p=0.39 | 4 (12.5)           | 3.65[0.38 – 35.34]; p=0.26 |
| Alcohol (drinks/week)    | 0      | 14 (51.9)      | 12 (60.0)       | 1.00                       | 13 (40.6)          | 1.00                       |
|                          | 1-2    | 10 (37.0)      | 6 (30.0)        | 0.70[0.20 – 2.50]; p=0.58  | 11 (34.4)          | 1.19[0.38 – 3.70]; p=0.77  |
|                          | 3-7    | 3 (11.1)       | 2 (10.0)        | 0.79[0.11 – 5.46]; p=0.80  | 8 (25.0)           | 2.87[0.62 – 13.22]; p=0.18 |
| Associated Conditions    | No     | 16 (59.3)      | 11 (55.0)       | 1.00                       | 18 (56.3)          | 1.00                       |
|                          | Yes    | 11 (40.7)      | 9 (45.0)        | 1.19[0.37 – 3.83]; p=0.77  | 14 (43.8)          | 1.13[0.40 – 3.19]; p=0.82  |

127 CD = coeliac disease; OR = Odds Ratio; CI = Confidence Interval; BMI = body mass index; SE = standard error.

128 \*Linear variable, therefore β±SE is reported.



129 In individuals with CD gluten ingestion results in intestinal inflammation and villous atrophy,  
130 which can be reversed following removal of dietary gluten [2, 3, 20-22]. Individuals with active  
131 CD who are not on a GFD have been reported to have shorter TL when compared to age-  
132 matched controls in their intestinal mucosa and peripheral blood leukocytes [1, 13]. The  
133 current study was conducted in treated CD individuals who were following a GFD. This may  
134 explain why no difference in TL between CD individuals and non-affected controls was  
135 observed, as TL is known to recover following the removal of inflammation inducing stressors  
136 [9, 23]. Lifestyle interventions including diet that aim to reduce inflammation and oxidative  
137 stress have been associated with recovery of TL in individuals recovering from cancer or in  
138 high stress professions [24-26]. Similar mechanisms may occur in CD, with TL recovering  
139 following reduced inflammation through the removal of dietary gluten. Furthermore, TL was  
140 measured in the oral mucosa, not intestinal mucosa or blood, which may have also contributed  
141 to the discrepancies observed. The oral mucosa was selected over the other tissue types for  
142 its accessibility compared to intestinal mucosa, and because the epithelia and *lamina propria*  
143 of oral mucosa reacts to gluten in individuals with CD [27].

144 For individuals who had been undiagnosed for a long period of time or who had experienced  
145 severe disease, the cellular damage to their intestinal mucosa can take many years to  
146 completely repair, even with a GFD [28, 29]. This may explain why individuals with CD who  
147 had commenced a GFD more recently had significantly shorter TL when compared with  
148 individuals who have been treated with a GFD for greater than 3 years. It could also explain  
149 why we saw a trend for shorter TL in more recently diagnosed CD individuals when compared  
150 to controls, while no difference was observed between CD individuals who had been on GFD  
151 for greater than 3 years when compared to controls, as TL also required longer periods of time  
152 to recover.

153 Undiagnosed CD is also associated with an increased risk of developing small intestinal  
154 adenocarcinoma and lymphomas [30]. In individuals with CD, this increased risk has been  
155 shown to be reduced with a GFD, with CD individuals treated with a GFD for greater than five

156 years having the same risk of cancer as healthy controls [30-32]. It is well established that  
157 telomere shortening and telomere dysfunction is a common alteration in the multistep process  
158 of malignant transformation in various cancers [33-36]. Telomere attrition may contribute to  
159 the increased risk of malignancy in CD [1], however further studies are required to confirm  
160 this. Nonetheless, these observations highlight the importance of early diagnosis and  
161 treatment of CD to minimise the degree of telomere attrition and risk of malignancy. Early  
162 diagnosis and treatment would also enable the repair of intestinal mucosal damage and TL  
163 recovery, following the removal of a gluten-induced inflammatory response.

164 CD has a variable clinical course, some individuals may have had sub-clinical disease for a  
165 prolonged period prior to diagnosis, and therefore the years since diagnosis may not always  
166 reflect the length of time that the individual had been living with disease. We attempted to  
167 reduce this effect by studying a younger population (<35 years of age) who were less likely to  
168 have lived with untreated CD for prolonged periods. This study used saliva instead of intestinal  
169 mucosa to measure TL, and our findings may not apply to telomeres measured in other tissues  
170 of individuals with CD. However, as untreated CD is characterised by systemic inflammation,  
171 and the oral mucosa of CD individuals is known to react to gluten exposure, saliva represents  
172 an appropriate and non-invasive tissue source to measure TL.

173 This study measured salivary TL in individuals with treated CD, and non-affected controls. We  
174 found no significant difference in salivary TL between individuals with CD and controls. Within  
175 the CD cohort, the length of time on a GFD was significantly associated with relative salivary  
176 TL, with individuals who had commenced a GFD within the past three years having shorter  
177 telomeres compared with individuals who had been treated with a GFD for longer than three  
178 years. Treatment of CD with a GFD may assist in the recovery of telomere length, highlighting  
179 the importance of early diagnosis and initiation of a GFD to minimise exposure to mucosal  
180 damage and telomere attrition.

181

## 182   **References**

- 183    1.       Cottliar A, Palumbo M, La Motta G, de Barrio S, Crivelli A, Viola M, et al. Telomere  
184    length study in celiac disease. *The American journal of gastroenterology*. 2003;98(12):2727-  
185    31. doi: 10.1111/j.1572-0241.2003.08720.x. PubMed PMID: 14687824.
- 186    2.       Dickson BC, Streutker CJ, Chetty R. Coeliac disease: an update for pathologists.  
187    *Journal of clinical pathology*. 2006;59(10):1008-16. doi: 10.1136/jcp.2005.035345. PubMed  
188    PMID: 17021129; PubMed Central PMCID: PMC1861744.
- 189    3.       Ferretti G, Bacchetti T, Masciangelo S, Saturni L. Celiac disease, inflammation and  
190    oxidative damage: a nutrigenetic approach. *Nutrients*. 2012;4(4):243-57. doi:  
191    10.3390/nu4040243. PubMed PMID: 22606367; PubMed Central PMCID: PMC3347005.
- 192    4.       Green PH, Lebwohl B, Greywoode R. Celiac disease. *The Journal of allergy and*  
193    *clinical immunology*. 2015;135(5):1099-106; quiz 107. doi: 10.1016/j.jaci.2015.01.044.  
194    PubMed PMID: 25956012.
- 195    5.       Counter CM. The roles of telomeres and telomerase in cell life span. *Mutation*  
196    *research*. 1996;366(1):45-63. PubMed PMID: 8921986.
- 197    6.       Masi S, Salpea KD, Li K, Parkar M, Nibali L, Donos N, et al. Oxidative stress, chronic  
198    inflammation, and telomere length in patients with periodontitis. *Free radical biology &*  
199    *medicine*. 2011;50(6):730-5. doi: 10.1016/j.freeradbiomed.2010.12.031. PubMed PMID:  
200    21195167.
- 201    7.       Skamra C, Romero-Diaz J, Sandhu A, Huang Q, Lee J, Pearce W, et al. Telomere  
202    length in patients with systemic lupus erythematosus and its associations with carotid plaque.  
203    *Rheumatology*. 2013;52(6):1101-8. doi: 10.1093/rheumatology/kes424. PubMed PMID:  
204    23382361; PubMed Central PMCID: PMC3651615.
- 205    8.       von Zglinicki T. Role of oxidative stress in telomere length regulation and replicative  
206    senescence. *Annals of the New York Academy of Sciences*. 2000;908:99-110. PubMed PMID:  
207    10911951.

- 208 9. Romano GH, Harari Y, Yehuda T, Podhorzer A, Rubinstein L, Shamir R, et al.  
209 Environmental stresses disrupt telomere length homeostasis. *PLoS genetics*.  
210 2013;9(9):e1003721. doi: 10.1371/journal.pgen.1003721. PubMed PMID: 24039592; PubMed  
211 Central PMCID: PMC3764183.
- 212 10. Guan JZ, Guan WP, Maeda T, Guoqing X, GuangZhi W, Makino N. Patients with  
213 multiple sclerosis show increased oxidative stress markers and somatic telomere length  
214 shortening. *Molecular and cellular biochemistry*. 2015;400(1-2):183-7. doi: 10.1007/s11010-  
215 014-2274-1. PubMed PMID: 25424527.
- 216 11. Wium-Andersen MK, Orsted DD, Rode L, Bojesen SE, Nordestgaard BG. Telomere  
217 length and depression: prospective cohort study and Mendelian randomisation study in 67 306  
218 individuals. *Br J Psychiatry*. 2017;210(1):31-8. Epub 2016/11/05. doi:  
219 10.1192/bjp.bp.115.178798. PubMed PMID: 27810892.
- 220 12. Belsky DW, Shalev I, Sears MR, Hancox RJ, Lee Harrington H, Houts R, et al. Is  
221 chronic asthma associated with shorter leukocyte telomere length at midlife? *Am J Respir Crit*  
222 *Care Med*. 2014;190(4):384-91. Epub 2014/06/24. doi: 10.1164/rccm.201402-0370OC.  
223 PubMed PMID: 24956257; PubMed Central PMCID: PMCPMC4214127.
- 224 13. Kamycheva E, Goto T, Camargo CA, Jr. Celiac disease autoimmunity is associated  
225 with leukocyte telomere shortening in older adults: The U.S. National Health and Nutrition  
226 Examination Survey. *Experimental gerontology*. 2017;89:64-8. doi:  
227 10.1016/j.exger.2017.01.003. PubMed PMID: 28104447.
- 228 14. Chiu CL, Hearn NL, Lind JM. Development of a Risk Score for Extraintestinal  
229 Manifestations of Coeliac Disease. *Medicine (Baltimore)*. 2016;95(15):e3286. Epub  
230 2016/04/16. doi: 10.1097/MD.0000000000003286. PubMed PMID: 27082568; PubMed  
231 Central PMCID: PMCPMC4839812.
- 232 15. WHO. WHO: Global data on body mass index 2016 [24/10/2016]. Available from:  
233 [http://apps.who.int/bmi/index.jsp?introPage=intro\\_3.html](http://apps.who.int/bmi/index.jsp?introPage=intro_3.html).
- 234 16. Reinton N, Helgheim A, Shegarfi H, Moghaddam A. A one-step real-time PCR assay  
235 for detection of DQA1\*05, DQB1\*02 and DQB1\*0302 to aid diagnosis of celiac disease.

- 236 Journal of immunological methods. 2006;316(1-2):125-32. doi: 10.1016/j.jim.2006.08.008.  
237 PubMed PMID: 17020762.
- 238 17. Cawthon RM. Telomere length measurement by a novel monochrome multiplex  
239 quantitative PCR method. Nucleic acids research. 2009;37(3):e21. doi: 10.1093/nar/gkn1027.  
240 PubMed PMID: 19129229; PubMed Central PMCID: PMC2647324.
- 241 18. Simoes HG, Sousa CV, Dos Santos Rosa T, da Silva Aguiar S, Deus LA, Rosa E, et  
242 al. Longer Telomere Length in Elite Master Sprinters: Relationship to Performance and Body  
243 Composition. Int J Sports Med. 2017;38(14):1111-6. Epub 2017/11/04. doi: 10.1055/s-0043-  
244 120345. PubMed PMID: 29100249.
- 245 19. Livak KJ, Schmittgen TD. Analysis of relative gene expression data using real-time  
246 quantitative PCR and the 2(-Delta Delta C(T)) Method. Methods. 2001;25(4):402-8. doi:  
247 10.1006/meth.2001.1262. PubMed PMID: 11846609.
- 248 20. Barker JM, Liu E. Celiac disease: pathophysiology, clinical manifestations, and  
249 associated autoimmune conditions. Advances in pediatrics. 2008;55:349-65. PubMed PMID:  
250 19048738; PubMed Central PMCID: PMC2775561.
- 251 21. Heyman M, Menard S. Pathways of gliadin transport in celiac disease. Annals of the  
252 New York Academy of Sciences. 2009;1165:274-8. doi: 10.1111/j.1749-6632.2009.04032.x.  
253 PubMed PMID: 19538316.
- 254 22. Galli G, Esposito G, Lahner E, Pilozi E, Corleto VD, Di Giulio E, et al. Histological  
255 recovery and gluten-free diet adherence: a prospective 1-year follow-up study of adult patients  
256 with coeliac disease. Alimentary pharmacology & therapeutics. 2014;40(6):639-47. doi:  
257 10.1111/apt.12893. PubMed PMID: 25066096.
- 258 23. Coluzzi E, Colamartino M, Cozzi R, Leone S, Meneghini C, O'Callaghan N, et al.  
259 Oxidative stress induces persistent telomeric DNA damage responsible for nuclear  
260 morphology change in mammalian cells. PloS one. 2014;9(10):e110963. doi:  
261 10.1371/journal.pone.0110963. PubMed PMID: 25354277; PubMed Central PMCID:  
262 PMC4212976.

- 263 24. Ornish D, Lin J, Chan JM, Epel E, Kemp C, Weidner G, et al. Effect of comprehensive  
264 lifestyle changes on telomerase activity and telomere length in men with biopsy-proven low-  
265 risk prostate cancer: 5-year follow-up of a descriptive pilot study. *The Lancet Oncology*.  
266 2013;14(11):1112-20. doi: 10.1016/S1470-2045(13)70366-8. PubMed PMID: 24051140.
- 267 25. Thimmapuram J, Pargament R, Sibliss K, Grim R, Risques R, Toorens E. Effect of  
268 heartfulness meditation on burnout, emotional wellness, and telomere length in health care  
269 professionals. *J Community Hosp Intern Med Perspect*. 2017;7(1):21-7. Epub 2017/06/22. doi:  
270 10.1080/20009666.2016.1270806. PubMed PMID: 28634520; PubMed Central PMCID:  
271 PMC5463663.
- 272 26. Hoge EA, Chen MM, Orr E, Metcalf CA, Fischer LE, Pollack MH, et al. Loving-Kindness  
273 Meditation practice associated with longer telomeres in women. *Brain Behav Immun*.  
274 2013;32:159-63. Epub 2013/04/23. doi: 10.1016/j.bbi.2013.04.005. PubMed PMID:  
275 23602876.
- 276 27. Lahteenoja H, Maki M, Viander M, Raiha I, Vilja P, Rantala I, et al. Local challenge on  
277 oral mucosa with an alpha-gliadin related synthetic peptide in patients with celiac disease. *The*  
278 *American journal of gastroenterology*. 2000;95(10):2880-7. doi: 10.1111/j.1572-  
279 0241.2000.02257.x. PubMed PMID: 11051363.
- 280 28. Rubio-Tapia A, Rahim MW, See JA, Lahr BD, Wu TT, Murray JA. Mucosal recovery  
281 and mortality in adults with celiac disease after treatment with a gluten-free diet. *The American*  
282 *journal of gastroenterology*. 2010;105(6):1412-20. doi: 10.1038/ajg.2010.10. PubMed PMID:  
283 20145607; PubMed Central PMCID: PMC2881171.
- 284 29. Collin P, Mäki M, Kaukinen K. Complete small intestinal mucosal recovery is obtainable  
285 in the treatment of celiac disease. *Gastrointestinal Endoscopy*. 59(1):158-9. doi:  
286 10.1016/S0016-5107(03)01311-7.
- 287 30. Olen O, Askling J, Ludvigsson JF, Hildebrand H, Ekblom A, Smedby KE. Coeliac  
288 disease characteristics, compliance to a gluten free diet and risk of lymphoma by subtype.  
289 *Digestive and liver disease : official journal of the Italian Society of Gastroenterology and the*

- 290 Italian Association for the Study of the Liver. 2011;43(11):862-8. doi:  
291 10.1016/j.dld.2011.07.012. PubMed PMID: 21880561.
- 292 31. Holmes GK, Prior P, Lane MR, Pope D, Allan RN. Malignancy in coeliac disease--  
293 effect of a gluten free diet. *Gut*. 1989;30(3):333-8. PubMed PMID: 2707633; PubMed Central  
294 PMCID: PMC1378455.
- 295 32. Verkarre V, Romana SP, Cerf-Bensussan N. Gluten-free diet, chromosomal  
296 abnormalities, and cancer risk in coeliac disease. *Journal of pediatric gastroenterology and  
297 nutrition*. 2004;38(2):140-2. PubMed PMID: 14734873.
- 298 33. Kim HR, Kim YJ, Kim HJ, Kim SK, Lee JH. Telomere length changes in colorectal  
299 cancers and polyps. *Journal of Korean medical science*. 2002;17(3):360-5. doi:  
300 10.3346/jkms.2002.17.3.360. PubMed PMID: 12068140; PubMed Central PMCID:  
301 PMC3054880.
- 302 34. Sommerfeld HJ, Meeker AK, Piatyszek MA, Bova GS, Shay JW, Coffey DS.  
303 Telomerase activity: a prevalent marker of malignant human prostate tissue. *Cancer research*.  
304 1996;56(1):218-22. PubMed PMID: 8548767.
- 305 35. Tahara T, Shibata T, Kawamura T, Horiguchi N, Okubo M, Nakano N, et al. Telomere  
306 length shortening in gastric mucosa is a field effect associated with increased risk of gastric  
307 cancer. *Virchows Archiv : an international journal of pathology*. 2016;469(1):19-24. doi:  
308 10.1007/s00428-016-1948-3. PubMed PMID: 27173780.
- 309 36. Blasco MA. Telomeres and human disease: ageing, cancer and beyond. *Nature  
310 reviews Genetics*. 2005;6(8):611-22. doi: 10.1038/nrg1656. PubMed PMID: 16136653.
- 311

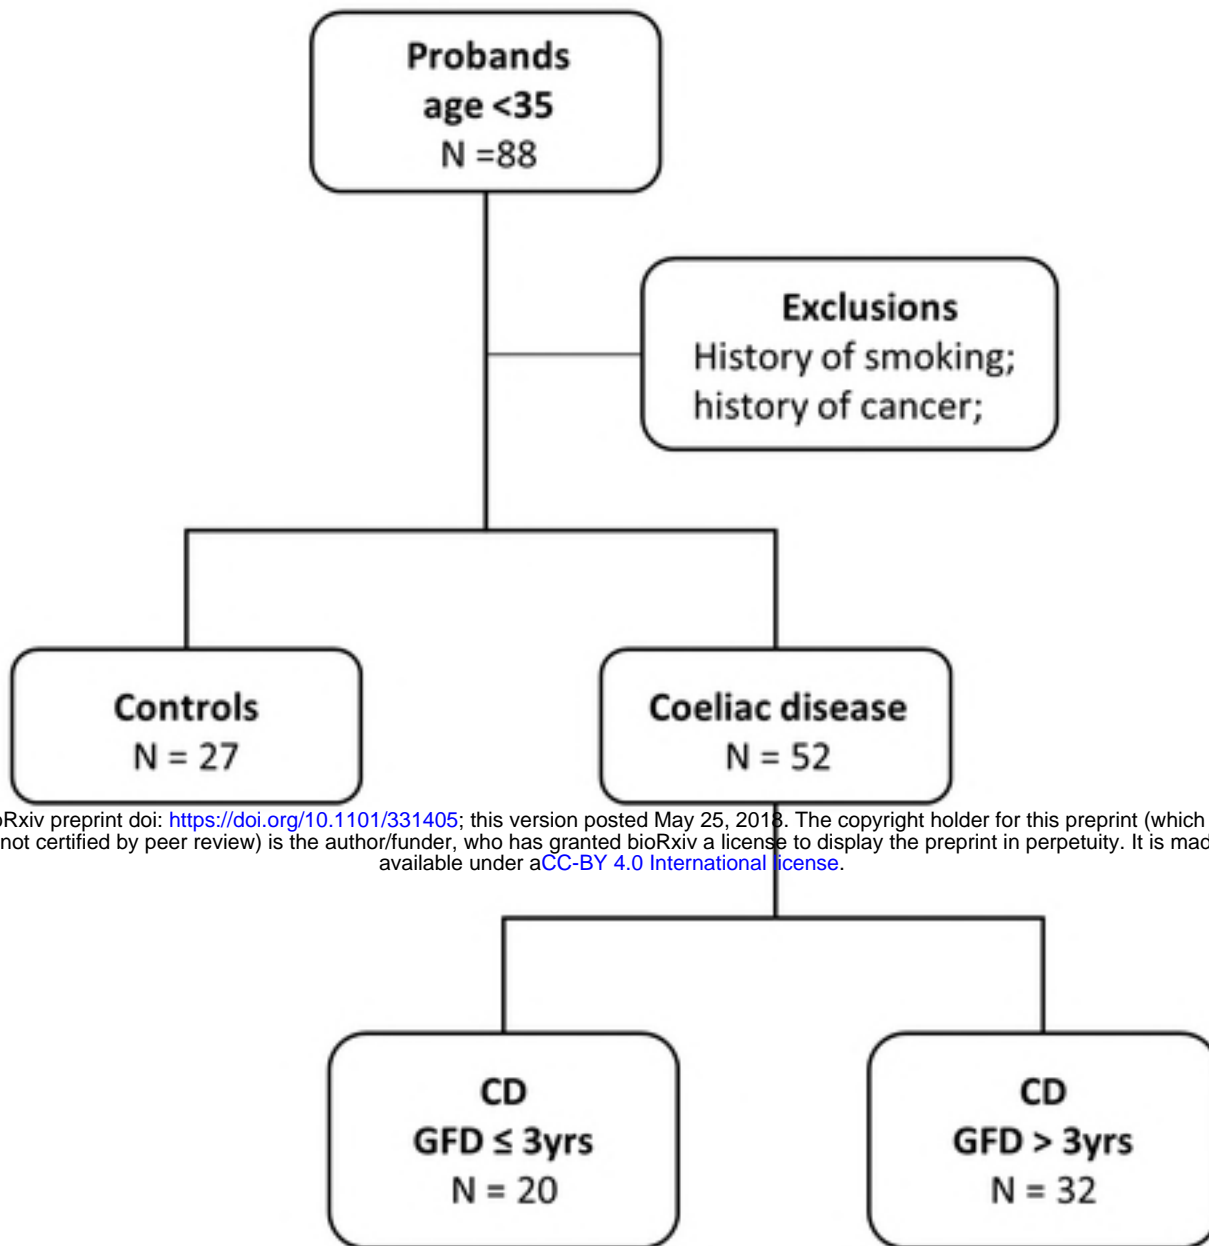

bioRxiv preprint doi: <https://doi.org/10.1101/331405>; this version posted May 25, 2018. The copyright holder for this preprint (which was not certified by peer review) is the author/funder, who has granted bioRxiv a license to display the preprint in perpetuity. It is made available under aCC-BY 4.0 International license.



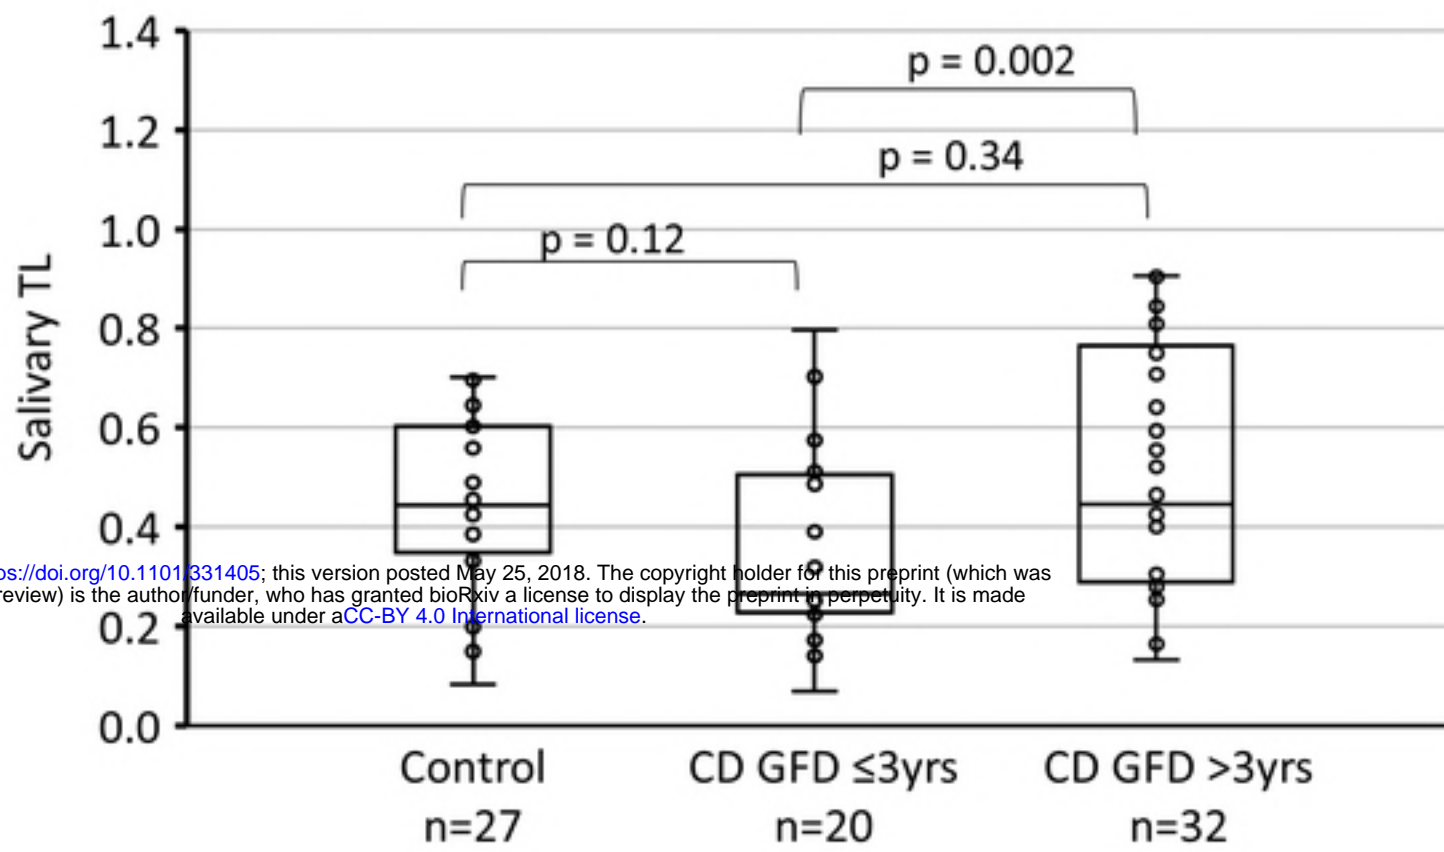

bioRxiv preprint doi: <https://doi.org/10.1101/331405>; this version posted May 25, 2018. The copyright holder for this preprint (which was not certified by peer review) is the author/funder, who has granted bioRxiv a license to display the preprint in perpetuity. It is made available under aCC-BY 4.0 International license.
